# Supplementary material
Source: PubMed Central journal article supplement (PMC3548955)

## Supplemental materials

### **Discrimination between CO and O<sub>2</sub> in heme oxygenase: Comparison of static structures and dynamic conformation changes following CO photolysis**

Masakazu Sugishima<sup>1,2,\*</sup>, Keith Moffat<sup>2,3</sup>, Masato Noguchi<sup>1</sup>

<sup>1</sup>Departments of Medical Biochemistry, Kurume University School of Medicine, 67 Asahi-machi, Kurume 830-0011, Japan.

<sup>2</sup>Department of Biochemistry and Molecular Biology, The University of Chicago, 929 East 57<sup>th</sup> Street, Chicago, IL 60637, USA.

<sup>3</sup>BioCARS, Center for Advanced Radiation Sources, The University of Chicago, Chicago, IL 60637, USA

\*To whom correspondence should be addressed. E-mail: sugishima\_masakazu@med.kurume-u.ac.jp. Phone: +81-942-31-7544, Fax: +81-942-31-4377

**Figure S1.** Absorption spectrum of O<sub>2</sub>-bound heme-rHO-1 crystal. The major peaks of the absorption spectrum at 540 nm and 573 nm are consistent to the spectrum of the O<sub>2</sub>-bound heme-rHO-1 solution.(1)

**Figure S2.** Conformation changes depending on temperature change. Weighted difference Fourier map between before and after warm-up to 160 K, which is contoured by  $\pm 4.0 \sigma$ , is superimposed on the model of CO-bound form. Arrow shows the conformation change of Phe-167 by warm-up.

**Figure S3.** Fluctuated conformations in B-helix and the loop between B- and C-helices. O<sub>2</sub>-bound heme-rHO-1 structure (yellow) is superimposed onto CO-bound form (cyan; PDB ID: 1IX4). The peptide bond between Gln-41 and Val-42 shows two conformations and the major conformation in each form is shown for clarity. The minor conformation of each form is identical to the major conformation of the other. The orientation of the benzene ring in Phe-37 of B-helix, which is close to the site-2, is slightly different each other.

**Figure S4.** Superimposition of the CO-bound form (orange) on the ferrous form (gray) to minimize rms differences of heme atoms except for the propionate groups.

#### **References for the supplementary materials**

1. Yoshida, T., Noguchi, M., and Kikuchi, G. (1980) Oxygenated form of heme•heme oxygenase complex and requirement for second electron to initiate heme degradation from the oxygenated complex, *J. Biol. Chem.* *255*, 4418-4420.

**Table S1. Data collection and refinement statistics for O<sub>2</sub> bound form**

| <b>Crystallographic data</b>                        |                              |
|-----------------------------------------------------|------------------------------|
| Space group                                         | P3 <sub>2</sub> 21           |
| Unit cell dimensions (Å)                            | a = b = 65.14,<br>c = 120.39 |
| <b>Diffraction statistics</b>                       |                              |
| Resolution (Å)                                      | 30-1.8                       |
| No. of observations                                 | 115,375                      |
| No. of unique reflections                           | 27,933                       |
| Completeness (%) <sup>*</sup>                       | 99.2 (99.1)                  |
| Mean $I_{\sigma}/\sigma$                            | 14.6 (3.4)                   |
| $R_{\text{sym}}^{\text{a},*}$ (%)                   | 4.2 (45.4)                   |
| <b>Refinement statistics</b>                        |                              |
| $R_{\text{cryst}}/R_{\text{free}}$ (%) <sup>d</sup> | 15.6/18.3                    |
| R.m.s. deviations                                   |                              |
| Bond length (Å)                                     | 0.024                        |
| Bond angle (°)                                      | 2.596                        |
| No. of atoms per asymmetric unit,                   | 2004                         |
| Average of B-factors                                |                              |
| Protein                                             | 16.4                         |
| Water                                               | 34.7                         |
| Heme/O <sub>2</sub> /Formate                        | 15.2/19.6/32.0               |
| <b>Deposited PDB ID</b>                             | 4G7L                         |

<sup>a</sup> $R_{\text{sym}} = \sum_{\text{hkl}} \sum_i |I_i(\text{hkl}) - \langle I(\text{hkl}) \rangle| / \sum_{\text{hkl}} \sum_i I_i(\text{hkl})$ ,  $\langle I(\text{hkl}) \rangle$  is the mean intensity for multiple recorded reflections.

<sup>d</sup> $R_{\text{cryst}} = \sum |F_{\text{obs}}(\text{hkl}) - F_{\text{calc}}(\text{hkl})| / \sum |F_{\text{obs}}(\text{hkl})|$ .  $R_{\text{free}}$  is the  $R_{\text{cryst}}$  calculated for the five percent of the dataset not included in the refinement.

\*Values in parentheses are for the outermost shells (1.83-1.80 Å).

**Table S2. Data collection and refinement statistics for CO photolysis datasets**

| <b>Crystallographic data</b>                        | Dark1                     | Light1             | Dark2                     | Light2         |
|-----------------------------------------------------|---------------------------|--------------------|---------------------------|----------------|
| Space group                                         |                           | P3 <sub>2</sub> 21 |                           |                |
| Unit cell dimensions (Å)                            | a = b = 65.84, c = 120.27 |                    | a = b = 65.82, c = 119.88 |                |
| <b>Diffraction statistics</b>                       |                           |                    |                           |                |
| Laser illumination                                  | dark                      | 1 hr               | dark                      | 16 hr          |
| Laser power density (mW/mm <sup>2</sup> )           | -                         | 314                | -                         | 768            |
| Resolution (Å)                                      | 50 - 1.9                  | 50 - 1.9           | 50 - 1.9                  | 50 - 1.9       |
| No. of observations                                 | 121,926                   | 122,839            | 144,581                   | 145,576        |
| No. of unique reflections                           | 22,075                    | 22,725             | 24,237                    | 24,439         |
| Completeness (%) <sup>*</sup>                       | 92.7 (95.6)               | 92.7 (95.4)        | 99.3 (98.3)               | 99.2 (98.6)    |
| Mean $I_o/\sigma$                                   | 16.1 (3.5)                | 15.8 (3.4)         | 10.4 (2.7)                | 11.8 (3.0)     |
| $R_{\text{sym}}^{\text{a,*}}$ (%)                   | 4.2 (44.9)                | 4.2 (46.6)         | 6.4 (62.1)                | 5.3 (52.9)     |
| <b>Refinement statistics</b>                        |                           |                    |                           |                |
| $R_{\text{cryst}}/R_{\text{free}}$ (%) <sup>d</sup> | 16.6/20.1                 | 17.3/21.0          | 16.2/20.5                 | 16.6/20.9      |
| R.m.s. deviations                                   |                           |                    |                           |                |
| Bond length (Å)                                     | 0.022                     | 0.022              | 0.021                     | 0.023          |
| Bond angle (°)                                      | 2.938                     | 2.926              | 2.976                     | 2.462          |
| No. of atoms per asymmetric unit,                   | 1930                      | 1912               | 2017                      | 2006           |
| Average of B-factors                                |                           |                    |                           |                |
| Protein                                             | 21.7                      | 27.8               | 17.0                      | 16.5           |
| Water                                               | 34.8                      | 34.0               | 37.0                      | 36.3           |
| Heme/CO/Formate                                     | 25.5/25.9/28.1            | 31.6/26.4/33.2     | 19.4/19.9/21.3            | 18.9/18.3/21.8 |
| <b>Deposited PDB ID</b>                             | 4G7P                      | 4G7T               | 4G7U                      | 4G8P           |

<sup>a</sup> $R_{\text{sym}} = \sum_{\text{hkl}} \sum_i |I_i(\text{hkl}) - \langle I(\text{hkl}) \rangle| / \sum_{\text{hkl}} \sum_i I_i(\text{hkl})$ ,  $\langle I(\text{hkl}) \rangle$  is the mean intensity for multiple recorded reflections.

<sup>d</sup> $R_{\text{cryst}} = \sum |F_{\text{obs}}(\text{hkl}) - F_{\text{calc}}(\text{hkl})| / \sum |F_{\text{obs}}(\text{hkl})|$ .  $R_{\text{free}}$  is the  $R_{\text{cryst}}$  calculated for the five percent of the dataset not included in the refinement.

\*Values in parentheses are for the outermost shells (1.93-1.90 Å).

**Table S3. Data collection and refinement statistics for O<sub>2</sub> photolysis datasets**

| <b>Crystallographic data</b>                        | Dark                      | Light          |
|-----------------------------------------------------|---------------------------|----------------|
| Space group                                         |                           |                |
| Unit cell dimensions (Å)                            | a = b = 65.17, c = 120.64 |                |
| <b>Diffraction statistics</b>                       |                           |                |
| Laser illumination                                  | dark                      | 13 hr          |
| Laser power density (mW/mm <sup>2</sup> )           | -                         | 611            |
| Resolution (Å)                                      | 30 – 2.1                  | 30 – 2.4       |
| No. of observations                                 | 61,412                    | 41,076         |
| No. of unique reflections                           | 17,780                    | 12,112         |
| Completeness (%) <sup>*</sup>                       | 99.0 (99.1)               | 98.7 (99.2)    |
| Mean $I_{\sigma}/\sigma$                            | 10.7 (2.7)                | 9.4 (2.0)      |
| $R_{\text{sym}}^{\text{a},*}$ (%)                   | 6.0 (52.9)                | 8.0 (64.8)     |
| <b>Refinement statistics</b>                        |                           |                |
| $R_{\text{cryst}}/R_{\text{free}}$ (%) <sup>d</sup> | 15.5/18.8                 | 16.6/22.8      |
| R.m.s. deviations                                   |                           |                |
| Bond length (Å)                                     | 0.018                     | 0.016          |
| Bond angle (°)                                      | 2.397                     | 2.223          |
| No. of atoms per asymmetric unit,                   | 1997                      | 1896           |
| Average of B-factors                                |                           |                |
| Protein                                             | 32.6                      | 40.0           |
| Water                                               | 49.2                      | 58.2           |
| Heme/O <sub>2</sub> /Formate                        | 31.2/35.1/43.4            | 41.3/28.0/50.0 |
| <b>Deposited PDB ID</b>                             | 4G8U                      | 4G8W           |

<sup>a</sup> $R_{\text{sym}} = \sum_{\text{hkl}} \sum_i |I_i(\text{hkl}) - \langle I(\text{hkl}) \rangle| / \sum_{\text{hkl}} \sum_i I_i(\text{hkl})$ ,  $\langle I(\text{hkl}) \rangle$  is the mean intensity for multiple recorded reflections.

<sup>d</sup> $R_{\text{cryst}} = \sum |F_{\text{obs}}(\text{hkl}) - F_{\text{calc}}(\text{hkl})| / \sum |F_{\text{obs}}(\text{hkl})|$ .  $R_{\text{free}}$  is the  $R_{\text{cryst}}$  calculated for the five percent of the dataset not included in the refinement.

\*Values in parentheses are for the outermost shells (2.14-2.10 Å for dark data and 2.44-2.40 Å for light data, respectively).

**Table S4. Data collection and refinement statistics of CO-bound form for temperature change**

| <b>Crystallographic data</b>                        |                           |                |
|-----------------------------------------------------|---------------------------|----------------|
| Space group                                         | P3 <sub>2</sub> 21        |                |
| Unit cell dimensions (Å)                            | a = b = 65.97, c = 120.02 |                |
| <b>Diffraction statistics</b>                       |                           |                |
| Warm-up temperature (K)                             | none                      | 160            |
| Resolution (Å)                                      | 50 - 2.3                  | 50 - 2.3       |
| No. of observations                                 | 86,086                    | 85,845         |
| No. of unique reflections                           | 14,009                    | 13,968         |
| Completeness (%) <sup>*</sup>                       | 99.8 (100)                | 99.8 (100)     |
| Mean $I_o/\sigma$                                   | 13.2 (6.2)                | 11.2 (4.9)     |
| $R_{\text{sym}}^{\text{a,*}}$ (%)                   | 6.8(38.2)                 | 7.2 (44.3)     |
| <b>Refinement statistics</b>                        |                           |                |
| $R_{\text{cryst}}/R_{\text{free}}$ (%) <sup>d</sup> | 15.3/21.8                 | 16.5/22.4      |
| R.m.s. deviations                                   |                           |                |
| Bond length (Å)                                     | 0.017                     | 0.023          |
| Bond angle (°)                                      | 2.862                     | 1.833          |
| No. of atoms per asymmetric unit,                   | 1944                      | 1944           |
| Average of B-factors                                |                           |                |
| Protein                                             | 26.7                      | 34.1           |
| Water                                               | 41.8                      | 43.2           |
| Heme/O <sub>2</sub> /Formate                        | 27.2/24.0/44.1            | 34.3/28.8/47.8 |
| <b>Deposited PDB ID</b>                             | 4G98                      | 4G99           |

<sup>a</sup> $R_{\text{sym}} = \sum_{\text{hkl}} \sum_i |I_i(\text{hkl}) - \langle I(\text{hkl}) \rangle| / \sum_{\text{hkl}} \sum_i I_i(\text{hkl})$ ,  $\langle I(\text{hkl}) \rangle$  is the mean intensity for multiple recorded reflections.

<sup>d</sup> $R_{\text{cryst}} = \sum |F_{\text{obs}}(\text{hkl}) - F_{\text{calc}}(\text{hkl})| / \sum |F_{\text{obs}}(\text{hkl})|$ .  $R_{\text{free}}$  is the  $R_{\text{cryst}}$  calculated for the five percent of the dataset not included in the refinement.

<sup>\*</sup>Values in parentheses are for the outermost shells (2.34-2.30 Å).

Figure S1

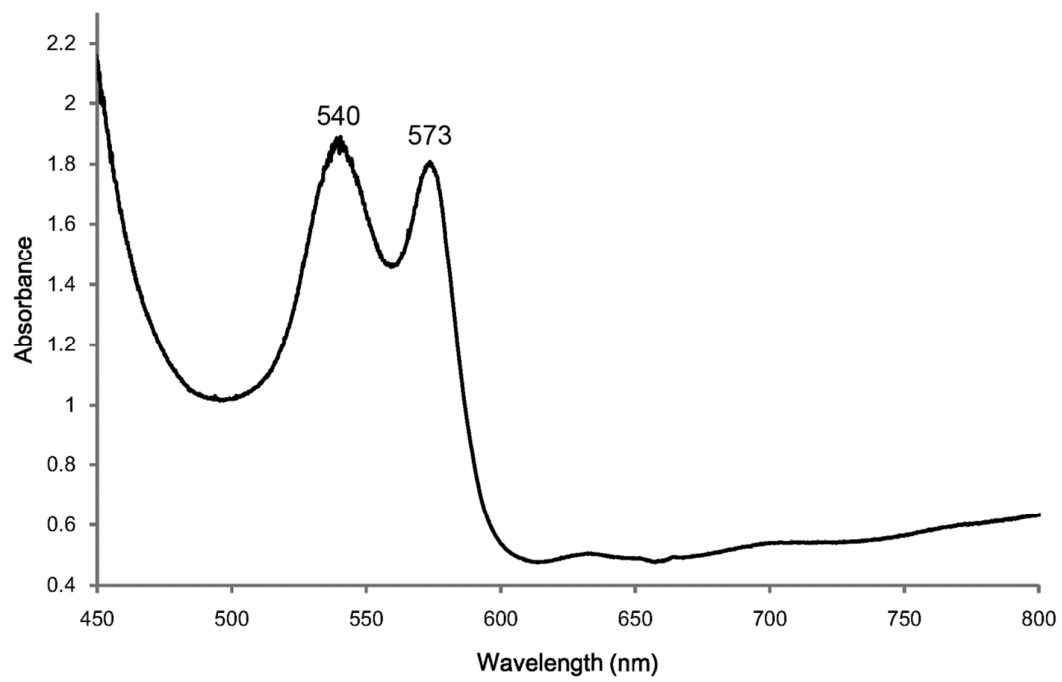

Figure S2

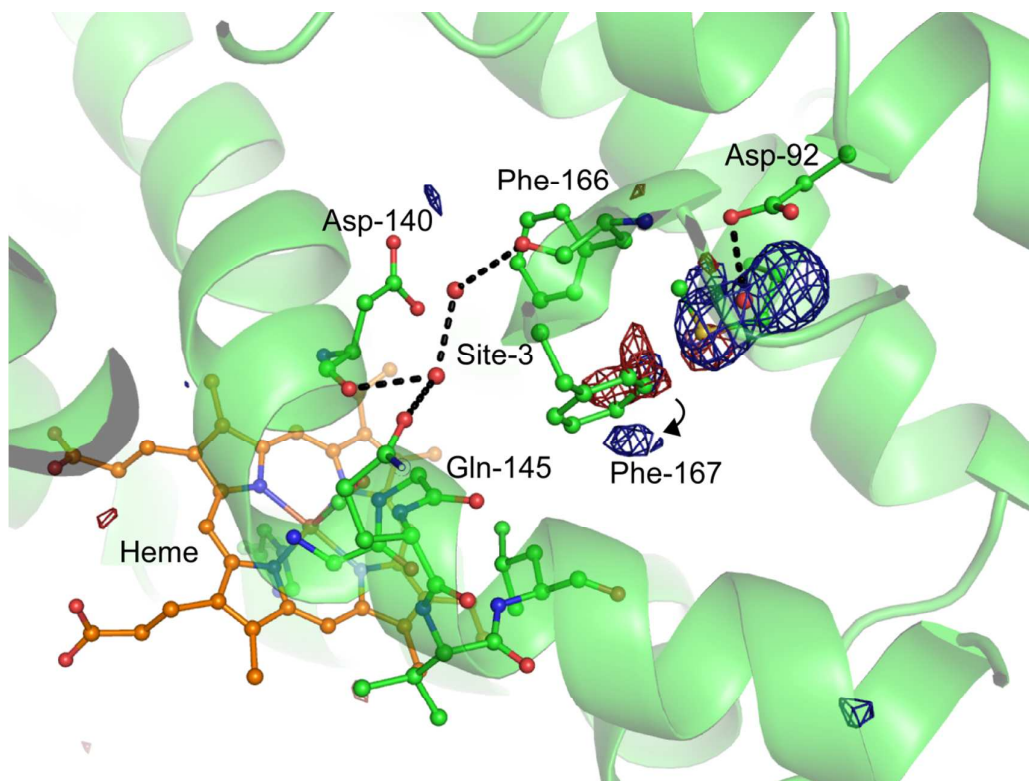



Figure S3

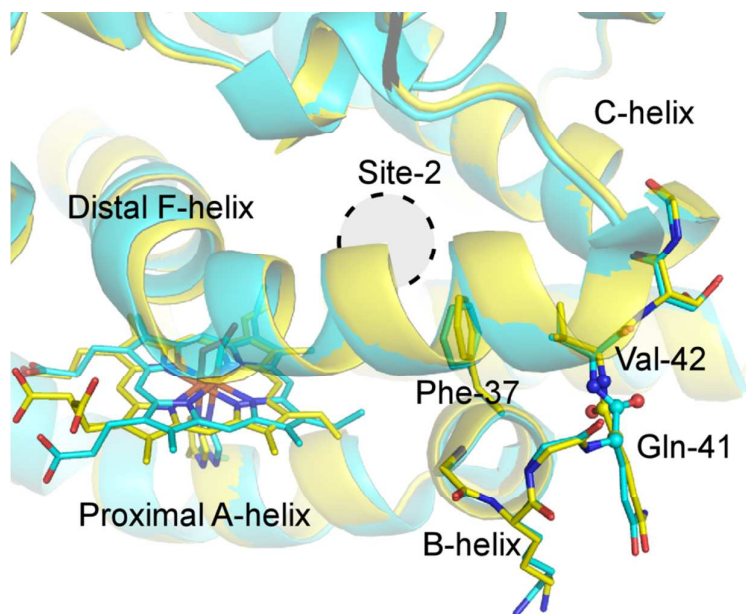

Figure S4

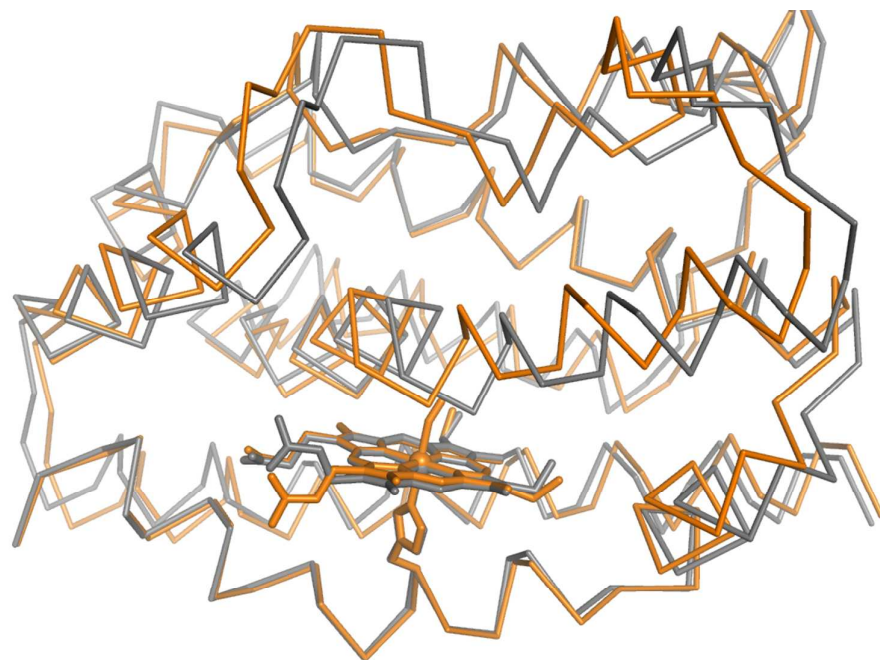

Supplement: NIHMS415279-supplement-1_si_001.pdf [file NIHMS415279-supplement-1_si_001.pdf]
